1 **Title: Screening of tomato seed bacterial endophytes for antifungal activity reveals lipopeptide**  
2 **producing *Bacillus siamensis* as a potential bio-control agent**

3 Ayushi Sharma<sup>1</sup>, Nutan Kaushik<sup>1\*</sup>, Abhishek Sharma<sup>1</sup>, Abhay Bajaj<sup>2</sup>, Mandar Rasane<sup>2</sup>, Yogesh S.  
4 Shouche<sup>2</sup>, Takwa Marzouk<sup>3</sup>, Naceur Djébal<sup>3</sup>

5 <sup>1</sup>Amity Food and Agriculture Foundation, Amity University Uttar Pradesh, Noida-201313, India

6 <sup>2</sup>National Centre for Cell Science, NCCS Complex, Savitribai Phule Pune University Campus, India

7 <sup>3</sup>Centre of Biotechnology of Borj Cedria (CBBC), Laboratory of Bioactive Substances, BP 901  
8 Hammam-lif 2050, Tunisia

9 \* Corresponding author: [kaushikn2008@gmail.com](mailto:kaushikn2008@gmail.com); [nkaushik5@amity.edu](mailto:nkaushik5@amity.edu)

10

11 **ABSTRACT**

12 The current study investigates the diversity pattern and fungicidal potential of bacterial endophytes  
13 isolated from two different organic varieties of tomato plants (V1 and V2). A total of seventy-four  
14 bacterial isolates identified by 16S rRNA sequencing revealed a single genus *Bacillus* with 16  
15 different species. The Shannon diversity H' (1.45), Simpson's index of diversity (0.9), Magalef  
16 index (2.1), Evenness (0.96), and Species richness (8) indicated the high endophytic bacterial  
17 diversity in the V1 variety of the tomato. Bacterial endophytes isolated from both the varieties were  
18 screened for their antifungal activity against five economically critical fungal pathogens (viz.,  
19 *Botrytis cinerea*, *Rhizoctonia solani*, *Fusarium solani*, *Verticillium lateritium*, and *Alternaria*  
20 *solani*) of tomato crop through dual culture assay. The data revealed *B. siamensis* KCTC 13613(T)  
21 as the most potent antagonist significantly ( $p < 0.05$ ), inhibiting the mycelial growth between 75 to  
22 90% against selected fungal pathogens. High bioactivity of lipopeptide extract of *B. siamensis* was  
23 recorded against *R. solani* with IC<sub>50</sub> value of 72 ppm. The UPLC-HDMS analysis of this lipopeptide  
24 extract revealed the presence of, Surfactin and Bacillomycin D.

25 **Keywords: Crop protection; Bio-pesticide; Diversity Indices (DI); Plant growth promotion;**  
26 **UPLC; Antagonistic**

27

28 [No. of words: 3943]

29 [No. of Figures: 10]

30 [No. of Tables: 05]

31

32

## 33 INTRODUCTION

34 Tomato (*Solanum lycopersicum*) is a well-known vegetable crop due to its high nutritional values.  
35 Like many other crop plants, it suffers from various fungal diseases. Its property to bear a succulent  
36 fruit increases its susceptibility towards fungal attacks than other crop plants, which is an essential  
37 limiting factor in its production (Habiba et al., 2017). The key phytopathogens responsible for  
38 damaging this crop include *Rhizoctonia solani*, *Fusarium solani*, *Botrytis cinerea*, *Alternaria solani*,  
39 and *Verticillium sp.* Because of their diverse host spectra and soilborne existence, fungal  
40 phytopathogens are difficult to control (Lamichhane et al., 2017). The use of chemical fungicides is  
41 the most common strategy to prevent fungal pathogens (Windels and Brantner, 2005). However, due  
42 to the rising environmental contamination and appearance of the pathogen's resistant races, seed bio  
43 priming with endophytes is being looked upon as an environmentally friendly option.

44 Endophytic bacteria play an essential task in managing plant health and diseases (Hazarika et al.,  
45 2019). These bacteria harbor inside the plant and contribute to reduced population densities of  
46 pathogens without stimulating hypersensitive reactions in the host (Hazarika et al., 2019; Roy et al.,  
47 2017). Bacterial endophyte composition varied among plants, organs, genotypes, tissues, cultivars,  
48 soil, and location (Kumar et al., 2020). The rhizosphere or phyllosphere work as a source for several  
49 endophytes; nevertheless, some bacterial species have been reported vertical transmission through  
50 seed (Truyens et al., 2015).

51 Many endophytic bacteria exhibit antagonistic ability towards fungal pathogens. *Bacillus* species  
52 produce heat and UV resistant spores that can withstand adverse environmental conditions, thereby  
53 becoming an attractive agent for commercial use in modern farming systems (Piggot and Hilbert  
54 2004; Tiago et al., 2004). The antifungal ability of isolate *Bacillus subtilis* SCB-1 was identified  
55 against diverse fungal pathogens, including the *Alternaria* and *Fusarium* (Hazarika et al., 2019).  
56 Isolation and characterization of highly antagonistic *Bacillus* strains have reported volatile organic  
57 compounds against *Sclerotinia sclerotiorum* (Massawe et al., 2018).

58 In the present study, the diversity of the endophytic bacteria isolated from the various tissues of two  
59 different organic tomato varieties was evaluated. We also characterized the antifungal activity of an  
60 endophytic bacterial isolate, *Bacillus siamensis* KCTC 13613(T) and identified the major antifungal  
61 components through UPLC-HDMS analysis.

62

## 63 **MATERIALS AND METHODS**

### 64 **Seed Collection**

65 Two organic tomato varieties were used in this study for the isolation of bacterial endophytes. Both  
66 the varieties, i.e., Pusa Ruby (Maharashtra) (V1) and a local variety of Andhra Pradesh  
67 (Madanapalle) (V2) were procured from the online garden stores, Ugao and Organic Garten,  
68 respectively.

### 69 **Isolation of Bacterial Endophytic Strains**

70 Surface sterilization of tomato seeds was performed to remove the epiphytic bacteria following the  
71 method described by Kumar et al. (2011). Seeds were first sterilized with 70 % ethanol for 2  
72 minutes, followed by a 1 % sodium hypochlorite solution for 3 minutes. After that, surface-  
73 sterilized seeds were washed three times with autoclaved distilled water and dried with sterile  
74 blotting paper. For sterility check, imprints of dry surface-sterilized seeds were taken on Luria-  
75 Bertani agar medium. Seeds were then put for germination on sterile filter paper immersed with  
76 autoclaved distilled water in a petri dish at 27°C. For isolation, seedlings obtained after the nine  
77 days of germination were again surface sterilized with the method described above. After sterility  
78 check, each seedling was cut into different sections viz., root, hypocotyl, and cotyledon. Each part  
79 was further divided into various segments and placed on the Luria-Bertani agar plate. Plates were  
80 then incubated for 2-3 days at 27°C. Visually distinct bacterial colonies acquired from segmented  
81 seedlings were purified and maintained in LB agar slants/plates and glycerol stock at 4°C and -  
82 80°C, respectively.

### 83 **Identification of Bacterial Isolates and Construction of Phylogenetic Evolution**

84 The identification of isolates was carried out at the Sequencing facility of National Centre for  
85 Microbial Resource (NCMR), National Centre for Cell Science, Pune. DNA extraction and  
86 purification was done using HiPurA™ 96 Bacterial Genomic DNA Purification Kit (Himedia), as  
87 per manufacturer's protocol; followed by amplification of 16S rRNA gene using universal bacterial  
88 primers (27F,1492R). Amplified products were sequenced by Sanger method on ABI 3730xl  
89 Genetic Analyzer (Applied BioSystems). The sequences were aligned and evaluated for taxonomic  
90 identification by BLAST analysis (Boratyn et al., 2013). The phylogenetic tree was reconstructed by

91 doing alignment using Clustal W and the evolutionary history inferred using the Neighbor-Joining  
92 method. A tree with 1000 bootstrap replicates was constructed using MEGA-X.

### 93 **Diversity Indices**

94 Bacterial endophytes derived from organic tomato seedlings were grouped into their specific  
95 isolation sections, such as hypocotyl, root, and cotyledon, which facilitated the comparison between  
96 the isolates of the same or other variety. Species diversity was calculated using the Shannon  
97 diversity index to measure species evenness and richness (Chowdhary and Kaushik, 2017).

$$H' = - \sum_{i=1}^s p_i \ln(p_i)$$

98 Where,  $s$  equals the number of species, and  $p_i$  equals the ratio of individuals of species  $i$  divided by  
99 all individuals  $N$  of all species. The Shannon diversity index ranges typically from 1.5 to 3.5 and  
100 rarely reaches 4.5. Simpson's index ( $D$ ) was calculated to determine the dominance, the higher the  
101 value lower in the diversity (Ifo et al., 2016).

$$D = \sum_{i=1}^s \left( \frac{n_i(n_i - 1)}{N(N - 1)} \right)$$

102 Where,  $n_i$  is the number of individuals in the  $i^{\text{th}}$  species and  $N$  equals the total number of individuals  
103 and Simpson's index of diversity was calculated b

$$104 \quad D' = (1 - D)$$

105 Other parameters, such as species evenness and richness, were also calculated (Ifo et al., 2016).  
106 Margalef's index ( $d$ ) also indicates the evenness (Kumar et al., 2006). A value for evenness  
107 approaching zero reflects large differences in the abundance of species, whereas an evenness of one  
108 means all species are equally abundant,

$$d = \frac{(S - 1)}{\ln(N)}$$

109  $S$  is the total number of species;  $N$  is the number of individuals, and the natural logarithm.

110 To measure the similarity in the species composition for both varieties of tomato, we used  
111 Sorenson's index of similarity using the equation,

$$QS = 2a / (2a + b + C)$$

112 and Jaccard's index of similarity using the equation,

$$JS = a / (a + b + C)$$

113 Whereas, 'a' denotes the number of bacterial species commonly shared by both the varieties, 'b'  
114 denotes the number of bacterial species found in V1, and 'c' denotes the number of bacterial species  
115 found in V2 (Chowdhary et al., 2015).

### 116 **In-vitro Antifungal Activity of Bacterial Endophytes**

117 All the bacterial isolates were screened for their antagonistic activity against major pathogenic fungi  
118 of the tomato crop, namely, *Rhizoctonia solani* (ITCC-6430), *Fusarium solani* (ITCC-6731),  
119 *Botrytis cinerea* (ITCC-6011), *Alternaria solani* (ITCC-4632), and *Verticillium lateritium* (ITCC-  
120 2819) obtained from Indian Type Culture Collection (ITCC) at Indian Agricultural Research  
121 Institute (IARI), Pusa, New Delhi, India. Isolates were evaluated by dual culture assay on Potato  
122 Dextrose Agar (PDA) medium. Fully grown 7mm fungal disc was placed in the center of the PDA  
123 plate while bacterial isolate was streaked on both the sides of the fungal disc at equidistance. PDA  
124 plate inoculated only with the fungal disc was kept as control. After 3-5 days of incubation, plates  
125 were observed for the antagonism expressed by endophytic bacteria, and percentage growth  
126 inhibition was calculated. Growth inhibition (GI) was calculated as per the following:

$$127 \quad \text{GI} = \{(A-B)/A\} \times 100$$

128 Where, A = radial growth of the plant pathogenic fungus in control; B = radial growth of the plant  
129 pathogenic fungus in the presence of endophytic bacterial strain (dual inoculation).

### 130 **Extraction and Purification of Lipopeptide**

131 Bacterial endophyte, *B. siamensis*, with the most promising antagonistic activity against all the test  
132 pathogenic fungi, was further explored to produce antifungal lipopeptides. The lipopeptide  
133 extraction method involved acid precipitation and solvent extraction, as described by Romano et al.  
134 (2011). Briefly, extraction of lipopeptide from a cell-free supernatant was done by precipitation  
135 method at pH 2 using 6N HCl and incubated at 4<sup>0</sup>C overnight and then centrifuged at 12000 rpm for  
136 15 minutes at 4<sup>0</sup>C. The pellet was extracted using a mixture of Chloroform: Methanol (2:1, v/v)  
137 followed by centrifugation for at 12000 rpm for 15 minutes at 4<sup>0</sup>C. The extract present in the  
138 supernatant was filtered and concentrated to dryness by rotary evaporation. Waters ACQUITY  
139 UPLC H-class with Synapt G2-Si High Definition Mass Spectrometry (HDMS) system with the  
140 C18 column was employed for lipopeptide profiling. The lipopeptide extract (10 mg) was dissolved  
141 in 10 mL of HPLC grade ethanol extracts, and a 10 µL sample was injected into UPLC coupled with  
142 HDMS.

### 143 **Antifungal Bioassay of Lipopeptide**

144 The antifungal bioassay of lipopeptide was carried out by the agar diffusion method in PDA  
145 (Chowdhary and Kaushik, 2015). The lipopeptide was dissolved in ethanol to make a stock solution  
146 of 1000 ppm. From the stock solution 50  $\mu$ L, 150  $\mu$ L and 300  $\mu$ L along with ethanol control were  
147 spot-inoculated on agar medium in a petriplate at 4 equidistant points from the centre, where 7mm  
148 fungal agar disc was inoculated and then incubated in darkness at 27°C for 48-72 hrs. In parallel,  
149 PDA plate inoculated only with *R. solani* was kept as pure control. Percentage of growth inhibition  
150 (% GI) was calculated by comparing the radial distance of fungal growth towards each spot  
151 inoculation with ethanol control. IC<sub>50</sub> was calculated by regression equation analysis.

### 152 **Phytotoxicity Assay**

153 Phytotoxicity assay was conducted to ascertain the impact of the isolated bacterial endophyte on  
154 tomato seedlings' health. Surface sterilized seeds were bio-primed with the pure culture of *B.*  
155 *siamensis*, with the microbial load adjusted to  $\geq 10^8$  cfu/ml by diluting with sterile saline water. In  
156 contrast, uncoated surface-sterilized seeds were kept as control. Seeds were then kept for incubation  
157 with continuous agitation (150-200 rpm) at 27°C for 24 hrs. (Xia et al., 2015) After air drying, seeds  
158 were allowed to germinate on sterile filter paper immersed with autoclaved distilled water. After 9  
159 days of incubation at 27°C, the seedlings were observed for the basic growth parameters such as  
160 germination percentage, hypocotyl length, root length, and seedlings' wet weight.

### 161 **Data Analysis**

162 All the experiments were conducted with 3 sets of replication. For germination assay, 20 seeds were  
163 used in each replication of 3 in square Petri plates (100mm diameter). For the alignment of the  
164 sequences, software Clustal W was used. The evolutionary history is inferred using the Neighbor-  
165 Joining method. A tree with 1000 bootstrap replicates was constructed using MEGA-X. Heatmap  
166 was produced through online software Heatmapper ([www.heatmapper.ca](http://www.heatmapper.ca)).

## 167 **RESULTS**

### 168 **Isolation, Identification, and Phylogenetic Analysis**

169 Seventy-four bacterial endophytes were isolated from the various tissues of root, hypocotyl, and  
170 cotyledon of tomato plants of both the organic varieties (V1 and V2) using the culture-dependent  
171 technique. The majority of the isolates (59.4%) were obtained from the V1 variety. All the 74  
172 isolates were grouped into 13 species using 16S rRNA based molecular identification. Comparing

173 the two varieties, Pusa ruby (V1) harbored all the 13 species identified while the local variety (V2)  
174 possessed less diverse endophytic populations as only four species inhabited in it. All the bacterial  
175 isolates belonged to the phylum Firmicutes. The details of isolates concerning identification,  
176 accession number, similarity percentage, and source are summarized in **Table 1**. In the V1 variety,  
177 *Bacillus safensis* FO-36b (T) and *Bacillus siamensis* KCTC 13613(T) were the dominant species  
178 with relative abundance (RA) of 52.3 and 18.2%, respectively. In V2, *Bacillus australimaris* strain  
179 MCCC 1A05787 and *Bacillus safensis* strain NBRC 100820 were the dominant species with RA of  
180 40 and 36.6%, respectively (**Figure 1**).

181 In V1 isolates, only two endophytic bacterial strains, namely *Bacillus safensis* FO-36b(T) and  
182 *Bacillus siamensis* KCTC 13613(T), were isolated from all the three parts of tomato seedling (root,  
183 hypocotyl, and cotyledon), and other bacterial endophytic species were only exclusive to one or two  
184 tissues. However, three out of four species isolated from the V2 variety, namely, *Bacillus safensis*  
185 strain NBRC 100820, *Bacillus australimaris* strain MCCC 1A05787, *Bacillus zhangzhouensis* strain  
186 MCCC 1A08372, were found to inhabit the three parts of tomato seedling (root, hypocotyl, and  
187 cotyledon), whereas, *Bacillus amyloliquefaciens* strain MPA 1034 was found only in root region.  
188 The evolutionary history was inferred using the Neighbor-Joining method (**Figure 2**). The  
189 Phylogenetic analysis showed an evolutionary relationship between the isolated strains and all the  
190 species grouped into two broad categories. *B. siamensis* did not group with any other species  
191 identified by us.

### 192 **Distribution, Diversity, and Richness of Endophytic Bacterial Isolates**

193 Diversity indices were calculated between the bacterial endophytes isolated from each tissue of the  
194 two varieties of tomato plants used in the study (**Table 2**). Shannon diversity ( $H'$ ) was maximum in  
195 the hypocotyl (1.45) and cotyledon (1.33) of V1 variety, followed by the root (1.30). Least diversity  
196 was reported in the cotyledon region of V2 variety (0.92). Simpson's index of diversity was  
197 maximum in the root (1) of V2, followed by cotyledon (0.9) of V1. Species richness was determined  
198 by counting the number of species in each group and was found maximum in hypocotyl ( $n = 8$ ) of  
199 V1 variety followed by the root ( $n = 5$ ) and cotyledon ( $n = 4$ ) of V1. Magalef' index, calculated to  
200 estimate the evenness between the species of both the types, was found to be highest in hypocotyl  
201 (2.1) of V1 variety. Species shared between V1 and V2 were highest in hypocotyl, resulting in a high  
202 value of Sorenson's similarity index (0.266) (**Table 3**). A Venn diagram illustrated the species'  
203 number and the relationship between the isolated species within the same variety (**Figure 3**).

204 Interestingly, the V1 variety of tomato (Pusa Ruby) contains a more diverse population of  
205 endophytic bacteria as compared to V2 (**Table 2**).

### 206 **Antifungal Activity of the Isolated Endophytic Bacteria**

207 All the bacterial endophytes isolated from the two organic tomato varieties were screened for their  
208 antifungal activity against five economically important fungal pathogens of tomato crop viz. *R.*  
209 *solani*, *V. lateritium*, *B. cinerea*, *A. solani*, and *F. solani* through dual culture assay (**Figure 4**). The  
210 dual culture bioassay's key purpose was based on a bio-prospecting strategy to select potential  
211 endophytes with having antifungal activity. Among all the isolates, *B. siamensis* KCTC 13613(T)  
212 exhibited the highest antifungal activity having percentage growth inhibition values ranging from 75  
213 - 90%, against all the five major pathogens of the tomato crop (**Figure 5; Supplementary Table**  
214 **S1**). To the best of our knowledge, this is the first report on the antifungal activity of endophytic  
215 bacteria isolated from the organic varieties of tomato.

216 *B. amyloliquefaciens* was found to be the next best species. The activity pattern of *B. safensis* varied  
217 from strain to strain. The most active strain of *B. safensis* viz. *Bs safensis* strain NBRC 100820  
218 isolated from variety V2 recorded >70% growth inhibition activity against *R. solani* and *A. solani*.  
219 Simultaneously, *B. australimaris*, *B. nakamurai*, and *B. zhangzhouensis* showed very low to nil  
220 activity against the selected pathogens (**Supplementary Table S2**). Heatmap dendrogram revealed  
221 that the antifungal activity of the tested strains against *R. solani* positively correlated with *A. solani*  
222 while activity against *B. cinerea* correlated with activity against *F. solani* (**Figure 6**).

223 The endophytic population from variety V1 has been observed more antagonistic against all the five  
224 pathogenic fungi than the V2. None of the endophytes found active against all the five test  
225 pathogens. More than 95% of endophytic bacteria of V1 suppressed the growth of *R. solani* in dual  
226 culture assay with antagonistic activity up to 90%. Meanwhile, 17% of its population showed the  
227 antagonistic effect against all the test pathogens with over 70% inhibition.

### 228 **Antifungal Activity of Lipopeptide**

229 Ethanol extract of lipopeptide obtained from the culture of *B. siamensis* was subjected to bioassay to  
230 examine its antifungal activity against *R. solani*. Dose response was observed with R<sup>2</sup> value of 0.99  
231 88.8 % growth inhibition of *R. solani* was observed at 300 ppm extract of *B. siamensis* (**Figure 9**).  
232 The IC<sub>50</sub> value of 72 ppm was obtained using regression equation (**Supplementary Figure S1**).

233



## 234 **Lipopeptide Profiling by UPLC-HDMS**

235 To identify the compound responsible for the antifungal activity in *B. siamensis*, lipopeptide  
236 extraction was done from *B. siamensis* culture. Chromatographic separation and Mass Spectrometry  
237 of ethanol extract of the lipopeptide was performed on UPLC-H class with Synapt G2-Si-High  
238 Definition Mass Spectrometry (HDMS) system equipped with an auto sampler. **Figure 7** reveals  
239 the mass spectrum of the analyte showing the presence of the molecular peaks at m/z 994.8,  
240 1008.77, 1022.72, 1036.74, 1050.75, 1064.77, 1096.86, 1045.77, 1059.79, and 1079.81. These  
241 masses were assigned to Surfactin and Bacillomycin D lipopeptides (**Table 4**). The general  
242 molecular structures of the isolated antifungal lipopeptides are presented in **Figure 8**.

243

## 244 **Phytotoxicity Assay**

245 To assess whether *B. siamensis* has any detrimental effect on plant growth, a phytotoxic assay was  
246 performed by seed bacterization of tomato seeds (**Figure 10**). It was observed that the treatment with  
247 the pure culture of this strain did not hamper the germination and seedling growth (**Table 5**). Instead, it  
248 increased the fresh biomass of tomato seeding by 41.6%, hypocotyl length by 32.9%, root length by  
249 49.1%, besides a 6.7% increase in germination.

## 250 **DISCUSSION**

251 The present research covers two organic tomato varieties for greater cultivable diversity of  
252 endophytic bacteria and their antifungal ability against selected fungal pathogens. The seedlings of  
253 the V1 tomato plant variety were found to be rich in species abundances and the diversity of  
254 bacterial endophytes. Ours is the first report on the diversity study of endophytic bacteria from  
255 organic tomato plants. The plausible reason for the disparity in endophyte diversity between the two  
256 tomato plant varieties could be the variations in the rhizospheric microbiome that probably  
257 contribute to differential bacterial colonization in the plant endosphere (Liu et al., 2017; Compant et  
258 al., 2010). Species richness was found maximum in the hypocotyl of the seedling (n=8) of V1.  
259 These findings indicate that endophytic bacteria can exhibit a tissue-specific distribution, which has  
260 also been reported from other systems (Reinhold-Hurek and Hurek, 2011; Thomas and Reddy,  
261 2013; Xia et al., 2015). Previous studies have shown the species specificity of endophytes. The  
262 difference in endophytic assemblies in different tissue types can be due to the difference in their  
263 potential to use the substrate (Huang et al., 2008; Chowdhary and Kaushik, 2015). Yang et al.  
264 (2011) reported 72 bacterial endophytes, including 45 from the stem and 27 from the healthy tomato

265 plant leaves, and found *Brevibacillus brevis* W4, an endophyte antagonistic to *B. cinerea*. We  
266 believe that different agro-climatic locations (V1 from Maharashtra and V2 from Andhra Pradesh)  
267 resulted in endophytic population variations in the current study. The cultivable bacteria obtained  
268 from the tomato varieties' seedlings were similar to the phyla found inside the seedlings. This  
269 suggests that tomato seeds may contain a specific subset of bacteria that are likely to reach seed  
270 during the reproductive phase. These bacteria are most likely to play different roles in seed health  
271 seedling growth (Lopez et al., 2018). The host genotype is reported to play an essential role in  
272 managing the associated plant microorganisms, particularly the endophytes (Lundberg et al., 2012;  
273 Podolich et al., 2015; Upreti and Thomas, 2015). Also, there are indications of endophytic bacterial  
274 transmission via seeds, which might clarify their possible integral interaction with a specific host  
275 varietal (Truyens et al., 2014).

276 Despite being identical in the presence of species, our findings show that under-regulated  
277 conditions, not all bacteria inhibit mycelial growth; however, they vary in their ability to synthesize  
278 other inhibitory molecules. In comparison to the endophytes in variety V2, the V1 endophytic  
279 population is increasingly antagonistic to all five test fungi. The most potent antagonistic endophyte  
280 was identified through 16S rRNA sequencing as *B. siamensis* KCTC 13613(T). There was no  
281 physical contact between the isolates and the pathogen in the inhibition zone, indicating that the  
282 isolated active *Bacillus* species may generate definite antifungal substances that impede the mycelial  
283 growth (Lee et al., 2008). *B. siamensis* KCTC 13613(T) exhibits more antagonistic activity than  
284 other species against all the selected fungal pathogens. The z-score clustering facilitates the bacterial  
285 species relationship between the isolates in relation to the fungal pathogens. A higher z value  
286 suggests that genotypes will be better clustered by function, suggesting a clustering result, which is  
287 more biologically important (Bhattacharya et al., 2012). In variety, V1 *B. cinerea* and *F. solani* are  
288 less susceptible to antifungal behavior of some endophytic species or have similar responses to most  
289 of the bacterial species. Likewise, *R. solani* and *A. solani* linked similar responses with those of *V.*  
290 *lateritium*. This clustering is not by chance but because of a computer program that aims to close  
291 similar things together. However, in variety V2), *B. amyloliquefaciens* strain MPA 1034 is notable  
292 for maximum antifungal activity against all pathogen fungi.

293 Many endophytic and non-endophytic *Bacillus* spp. including *B. siamensis*, have been reported  
294 to produce a wide variety of structurally different antagonistic substances through secondary  
295 metabolism (Fira et al., 2018). Interestingly, the strains producing non-ribosomally synthesized

296 lipopeptides and peptides have shown enhanced fungicidal activities (Dimkic et al., 2013;  
297 Etchegaray et al., 2008). The LC-MS/MS-based analysis of the extract further confirmed the  
298 product of surfactin derivatives, iturin, and fengycin by *Bacillus* sp. (Jasim et al., 2016). This is the  
299 first experimental evidence of the presence of these antifungal lipopeptides in *B. siamensis*. The IC<sub>50</sub>  
300 value of 72 ppm showed the high potency of the crude extract obtained from the pure culture of *B.*  
301 *siamensis* to inhibit the growth of *R. solani*, thus further confirming that the antifungal activity of  
302 the *B. siamensis* is due to lipopeptides. Earlier, it was predicted through genome sequencing that *B.*  
303 *siamensis* contains Sufactin and Bacillomycin D genes (Pan et al., 2019). However, it is for the first  
304 time that it has been extracted and confirmed in the culture broth. It is believed that bioactive  
305 compounds producing bacterial endophytes can be an effective biological agent and a powerful tool  
306 for the development of a formulation against fungal pathogens in crop protection and for promoting  
307 plant growth. The mechanism of action of lipopeptides might depend on the structural and  
308 functional properties of lipopeptides (Zhang et al., 2013). Bacillomycin L antifungal activity against  
309 *R. solani* Kühn, which includes a specific association with intact fungal hyphae, has been  
310 extensively investigated using different fluorescent methods, gel retardation experiments, and  
311 electron microscopy (Zhang et al., 2013).

312 The majority of *B. siamensis* strain isolation has been reported from rhizosphere or other  
313 sources other than endophytic (Yoo et al., 2020; Hussain and Khan. 2020; Islam et al., 2019; Pastor-  
314 Bueis et al., 2017). Antifungal activity of filtrate obtained from the culture of *B. siamensis* has been  
315 previously reported, such as in a study by Putri et al., 2020, ethyl acetate extract of fermentation  
316 filtrate of *B. siamensis* showed antifungal activity against *Aspergillus niger*. Various *Bacillus*  
317 strains, including *B. siamensis*, has been identified to produce biosurfactants as surfactin variants  
318 based on analytical methods and surfactin gene phylogenetic analysis (Mehetre et al., 2019). A  
319 similar study conducted by Pan et al. (2019) reported *B. siamensis* to produce sets of bacillibactins,  
320 fengycins, bacillomycins, and surfactins through the mining of genome and metabolic profiling. The  
321 PCR study demonstrated the existence of genes (i.e., surfactin synthetase D and bacillomycin  
322 synthetase D) involved in cyclic lipopeptide biosynthesis against multidrug-resistant aquatic  
323 bacterial pathogens (Xu et al., 2018). This concludes that so far, no endophytic strain of *B.*  
324 *siamensis* with antifungal potential has been reported to produce surfactin and Bacillomycin D.  
325 Complete isolation and identification of these lipopeptides from *B. siamensis* KCTC 13613(T)  
326 isolated from the varieties of tomato plants is first to be reported. This indicates that the use of

327 beneficial bacteria native to their host plants may increase the success rate in screening bio-control  
328 experiments because these microbes are likely to be better adapted to their host and its associated  
329 environmental conditions than are strains retrieved from culture collections (Karimi et al., 2016;  
330 Köbrel et al., 2013).

331 A study by Karthik et al. (2017), compared to uninoculated control, bacterial inoculation  
332 treatment with endophytic strains on tomato seeds, significantly improved seed germination,  
333 seedling growth, vigor index, and biomass production. *Rhizobium taibaishanense* (RBEB2),  
334 *Pseudomonas psychrotolerance* (REB4) and *Microbacterium testaceum* (RBEB1) had significant  
335 positive effects on the germination of tomato seeds and vigor index. *Bacillus subtilis* (RBEB6)  
336 enhanced the biomass as well as root and shoot length of tomato seedling.

337 The data presented here collectively support the notion that soil properties and rhizospheric  
338 microflora can affect the endophytic microflora. To the best of our knowledge, this is the first report  
339 of the isolation and diversification of bacterial endophytes from organic tomato seeds; however, we  
340 only found the presence of *Bacillus* species. Comparatively, Pusa Ruby has a more diverse and  
341 biologically active endophytic population of bacteria, and lipopeptide producing *B. siamensis* is a  
342 promising antifungal bio-control agent.

#### 343 **AUTHOR CONTRIBUTIONS**

344 NK and ND conceived the idea, secured funding, planned the work and guided first author. AS  
345 (first author) performed the experimental work and wrote the manuscript. AS (third author) helped  
346 in data analysis. NK, AS (third author), and ND read and reviewed the manuscript. AB, MS and YS  
347 conducted the molecular identification of all the bacterial isolates. TM supported in lipopeptide  
348 extraction process.

#### 349 **FUNDING**

350 Financial support provided by the Department of Science and Technology, Government of India  
351 under Project No. DST/INT/TUNISIA/P-04/2017 and the Tunisian Ministry of Higher Education  
352 and Scientific Research under the TOMendo Project.

#### 353 **ACKNOWLEDGMENT**

354 The authors are thankful to the Amity University Uttar Pradesh, Noida (India) for providing the  
355 infrastructure for the smooth conduction of experiments.

356 **REFERENCES**

- 357 Bhattacharya, A., Chowdhury, N., and K De, R. (2012). Comparative Analysis of Clustering and  
358 Biclustering Algorithms for Grouping of Genes: Co-Function and Co-Regulation. *Curr.*  
359 *Bioinform.* 7, 63-76. doi: 10.2174/2F157489312799304440
- 360 Boratyn, G. M., Camacho, C., Cooper, P. S., Coulouris, G., Fong, A., Ma, N., et al. (2013).  
361 BLAST: a more efficient report with usability improvements. *Nucleic Acids Res.* 41, W29-  
362 W33. doi: 10.1093/nar/gkt282
- 363 Chowdhary, K., and Kaushik, N. (2015). Fungal endophyte diversity and bioactivity in the Indian  
364 medicinal plant *Ocimum sanctum* Linn. *PLoS One.* 10, e0141444.  
365 doi:10.1371/journal.pone.0141444
- 366 Chowdhary, K., and Kaushik, N. (2019). Biodiversity and In Vitro Inhibition Study of Fungal  
367 Endophytes of *Chlorophytum borivilianum* against Selected Phytopathogens. *Proc. Natl. Acad.*  
368 *Sci., India, Sect. B Biol. Sci.* 89, 113-121. doi: 10.1007/s40011-017-0924-2
- 369 Compant, S., Clément, C., and Sessitsch, A. (2010). Plant growth-promoting bacteria in the rhizo-  
370 and endosphere of plants: their role, colonization, mechanisms involved and prospects for  
371 utilization. *Soil Biol. Biochem.* 42, 669–678. doi:10.1016/j.soilbio.2009.11.024
- 372 Dimkić, I., Živković, S., Berić, T., Ivanović, Ž., Gavrilović, V., Stanković, S., et al. (2013).  
373 Characterization and evaluation of two *Bacillus* strains, SS-12.6 and SS-13.1, as potential agents  
374 for the control of phytopathogenic bacteria and fungi. *Biol. Control.* 65, 312-321. doi:  
375 10.1016/j.biocontrol.2013.03.012
- 376 Etchegaray, A., de Castro Bueno, C., de Melo, I. S., Tsai, S. M., de Fátima Fiore, M., Silva-  
377 Stenico, M. E., et al. (2008). Effect of a highly concentrated lipopeptide extract of *Bacillus*  
378 *subtilis* on fungal and bacterial cells. *Arch. Microbiol.* 190, 611-622. doi: 10.1007/s00203-008-  
379 0409-z
- 380 Fira, D., Dimkić, I., Berić, T., Lozo, J., and Stanković, S. (2018). Biological control of plant  
381 pathogens by *Bacillus* species. *J. Biotechnol.* 285, 44-55. doi: 10.1016/j.jbiotec.2018.07.044
- 382 Habiba, R. N., Ali, S. A., Hasan, K. A., Ara, J., Sultana, V., and Ehteshamul-Haque, S. (2017).  
383 Protective role of epiphytic fluorescent *Pseudomonas* on natural postharvest decay of tomato at

- 384 room temperature. *J. Appl. Bot. Food Qual.* 90, 288-297. doi:  
385 10.5073%2FJABFQ.2017.090.036
- 386 Hazarika, D. J., Goswami, G., Gautom, T., Parveen, A., Das, P., Barooah, M., et al. (2019).  
387 Lipopeptide mediated biocontrol activity of endophytic *Bacillus subtilis* against fungal  
388 phytopathogens. *BMC Microbiol.* 19, 71. doi: 10.1186/s12866-019-1440-8
- 389 Huang, W. Y., Cai, Y. Z., Hyde, K. D., Corke, H., and Sun, M. (2008) Biodiversity of endophytic  
390 fungi associated with 29 traditional Chinese medicinal plants. *Fungal Divers.* 33, 61–75.
- 391 Hussain, T., Khan, A. A. (2020). Determining the antifungal activity and characterization of  
392 *Bacillus siamensis* AMU03 against *Macrophomina phaseolina* (Tassi) Goid. *Indian Phytopathol.*  
393 doi: 10.1007/s42360-020-00239-6
- 394 Ifo, S. A., Moutsambote, J. M., Koubouana, F., Yoka, J., Ndzai, S. F., Bouetou-Kadilamio, L. N.  
395 O., et al. (2016). Tree species diversity, richness, and similarity in intact and degraded forest in  
396 the tropical rainforest of the Congo Basin: Case of the Forest of Likouala in the Republic of  
397 Congo. *J. For. Res.* 2, 1–12. doi: 10.1155/2016/7593681
- 398 Islam, A., Kabir, S., and Khair, A. (2019). Characterization and Evaluation of *Bacillus siamensis*  
399 isolate for its Growth Promoting Potential in Tomato. *Agriculture (Pol'nohospodárstvo)*. 65, 42-  
400 50. doi: 10.2478/agri-2019-0005
- 401 Jasim, B., Sreelakshmi, K. S., Mathew, J., and Radhakrishnan, E. K. (2016). Surfactin, iturin, and  
402 fengycin biosynthesis by endophytic *Bacillus* sp. from *Bacopa monnieri*. *Microb. Ecol.* 72, 106-  
403 119. doi: 10.1007/s00248-016-0753-5
- 404 Karimi, E., Safaie, N., Shams-Baksh, M., and Mahmoudi, B. (2016). *Bacillus amyloliquefaciens*  
405 SB14 from rhizosphere alleviates Rhizoctonia damping-off disease on sugar  
406 beet. *Microbiol. Res.* 192, 221-230. doi: 10.1016/j.micres.2016.06.011
- 407 Karthik, M., Pushpakanth, P., Krishnamoorthy, R., and Senthilkumar, M. (2017). Endophytic  
408 bacteria associated with banana cultivars and their inoculation effect on plant growth. *J. Hortic.*  
409 *Sci. Biotech.* 92, 568-576. doi: 10.1080/14620316.2017.1310600
- 410 Köberl, M., Ramadan, E. M., Adam, M., Cardinale, M., Hallmann, J., Heuer, H., et al. (2013).  
411 *Bacillus* and *Streptomyces* were selected as broad-spectrum antagonists against soilborne  
412 pathogens from arid areas in Egypt. *FEMS Microbiol. Lett.* 342, 168-178. doi: 10.1111/1574-  
413 6968.12089

- 414 Kumar, A., Marcot, B. G., and Saxena, A. (2006). Tree species diversity and distribution patterns  
415 in tropical forests of Garo Hills. *Curr. Sci.* 1370-1381. doi: 10.2307/24094061
- 416 Kumar, S., Kaushik, N., Edrada-Ebel, R., Ebel, R., and Proksch, P. (2011). Isolation,  
417 characterization, and bioactivity of endophytic fungi of *Tylophora indica*. *World J.*  
418 *Microb. Biot.* 27, 571-577. doi: 10.1007/s11274-010-0492-6
- 419 Kumar, V., Jain, L., Jain, S. K., Chaturvedi, S., and Kaushal, P. (2020). Bacterial endophytes of  
420 rice (*Oryza sativa* L.) and their potential for plant growth promotion and antagonistic  
421 activities. *S. Afr. J. Bot.* 1-14. doi: 10.1016/j.sajb.2020.02.017
- 422 Lamichhane, J. R., Dürr, C., Schwanck, A. A., Robin, M. H., Sarthou, J. P., Cellier, V., et al.  
423 (2017). Integrated management of damping-off diseases. A review. *Agron Sustain Dev.* 37, 10.  
424 doi: 10.1007/s13593-017-0417-y
- 425 Lee, K. J., Kamala-Kannan, S., Sub, H. S., Seong, C. K., and Lee, G. W. (2008). Biological control  
426 of Phytophthora blight in red pepper (*Capsicum annum* L.) using *Bacillus subtilis*. *World J.*  
427 *Microb. Biot.* 24, 1139-1145. doi: 10.1007/s11274-007-9585-2
- 428 Liu, H., Carvalhais, L. C., Crawford, M., Singh, E., Dennis, P. G., Pieterse, C. M., et al. (2017).  
429 Inner plant values: diversity, colonization and benefits from endophytic bacteria. *Front.*  
430 *Microbiol.* 8, 2552. doi: 10.3389/fmicb.2017.02552
- 431 Lundberg, D. S., Lebeis, S. L., Paredes, S. H., Yourstone, S., Gehring, J., Malfatti, S., et al. (2012).  
432 Defining the core *Arabidopsi thaliana* root microbiome. *Nature.* 488, 86–90.  
433 doi:10.1038/nature11237
- 434 Massawe, V. C., Hanif, A., Farzand, A., Mburu, D. K., Ochola, S. O., Wu, L., et al. (2018).  
435 Volatile compounds of endophytic *Bacillus* spp. have biocontrol activity against *Sclerotinia*  
436 *sclerotiorum*. *Phytopathology.* 108, 1373-1385. doi: 10.1094/PHYTO-04-18-0118-R
- 437 Mehetre, G. T., Dastager, S. G., and Dharme, M. S. (2019). Biodegradation of mixed polycyclic  
438 aromatic hydrocarbons by pure and mixed cultures of biosurfactant producing thermophilic and  
439 thermo-tolerant bacteria. *Sci. Total Environ.* 679, 52-60. doi: 10.1016/j.scitotenv.2019.04.376
- 440 Pan, H., Tian, X., Shao, M., Xie, Y., Huang, H., Hu, J., et al. (2019). Genome mining and  
441 metabolic profiling illuminate the chemistry driving diverse biological activities of *Bacillus*

- 442 *siamensis* SCSIO 05746. *Appl. Microbiol. Biotechnol.* 103, 4153-4165. doi: 0.1007/s00253-019-  
443 09759-2
- 444 Pastor-Bueis, R., Mulas, R., Gómez, X., and González-Andrés, F. (2017). Innovative liquid  
445 formulation of digestates for producing a biofertilizer based on *Bacillus siamensis*: Field testing  
446 on sweet pepper. *J. Plant Nutr. Soil Sc.* 180, 748-758. doi: 10.1002/jpln.201700200
- 447 Piggot, P. J., and Hilbert, D. W. 2004. Sporulation of *Bacillus subtilis*. *Curr. Opin. Microbiol.* 7,  
448 579–586. doi: 10.1016/j.mib.2004.10.001
- 449 Podolich, O., Ardanov, P., Zaets, I., Pirttilä, A. M., and Kozyrovska, N. (2015). Reviving of the  
450 endophytic bacterial community as a putative mechanism of plant resistance. *Plant Soil.* 388,  
451 367–377. doi:10.1007/s11104-014- 2235-1
- 452 Putri, B. R., Santoso, I., and Yasman, Y. (2020). “Antagonistic potential of *Bacillus siamensis*  
453 LDR against *Aspergillus niger* ABP and ART”, in AIP Conference Proceedings, AIP Publishing  
454 LLC, Vol. 2242, No. 1, p. 050017.
- 455 Reinhold-Hurek, B., and Hurek, T. (2011). Living inside plants: bacterial endophytes. *Curr. Opin.*  
456 *Plant Biol.* 14, 435–443. doi:10.1016/j.pbi.2011.04.004
- 457 Romano, A., Vitullo, D., Di Pietro, A., Lima, G., and Lanzotti, V. (2011). Antifungal lipopeptides  
458 from *Bacillus amyloliquefaciens* strain BO7. *J. Nat. Prod.* 74, 145-151. doi: 10.1021/np100408y
- 459 Roy, S., Chakraborty, S., and Basu, A. (2017). In vitro evaluation for antagonistic potential of  
460 some bio control isolates against important foliar fungal pathogens of cowpea. *Int. J. Curr.*  
461 *Microbiol. App. Sci.* 6, 2998-3011.
- 462 Thomas, P., and Reddy, K. M. (2013). Microscopic elucidation of abundant endophytic bacteria  
463 colonizing the cell wall-plasma membrane peri-space in the shoot-tip tissue of banana. *AoB*  
464 *Plants.* 5, 1–12. doi:10.1093/aobpla/plt011
- 465 Tiago, I., Teixeira, I., Silva, S., Chung, P., Veríssimo, A., and Manaia, C.M. (2004). Metabolic and  
466 genetic diversity of mesophilic and thermophilic bacteria isolated from composted municipal  
467 sludge on poly-  $\epsilon$  -caprolactones. *Curr. Microbiol.* 49, 407–414. doi: 10.1007/s00284-004-4353-  
468 0



- 469 Truyens, S., Weyens, N., Cuypers, A., and Vangronsveld, J. (2015). Bacterial seed endophytes:  
470 genera, vertical transmission and interaction with plants. *Environ. Microbiol. Rep.* 7, 40-50. doi:  
471 10.1111/1758-2229.12181
- 472 Upreti, R., and Thomas, P. (2015). Root-associated bacterial endophytes from *Ralstonia*  
473 *solanacearum* resistant and susceptible tomato cultivars and their pathogen antagonistic  
474 effects. *Front. Microbiol.* 6, 255. doi: 10.3389/fmicb.2015.00255
- 475 Windels, C. E., and Brantner, J. R., (2005). Early-season application of azoxystrobin to sugar beet  
476 for control of *Rhizoctonia solani* AG 4 and AG 2-2. *J. Sugar Beet Res.* 42, 1–18.
- 477 Xia, Y., DeBolt, S., Dreyer, J., Scott, D., and Williams, M. A. (2015). Characterization of  
478 culturable bacterial endophytes and their capacity to promote plant growth from plants grown  
479 using organic or conventional practices. *Front. Plant Sci.* 6, 490. doi: 10.3389/fpls.2015.00490
- 480 Xu, B. H., Lu, Y. Q., Ye, Z. W., Zheng, Q. W., Wei, T., Lin, J. F., et al. (2018). Genomics-guided  
481 discovery and structure identification of cyclic lipopeptides from the *Bacillus siamensis* JFL15.  
482 *PloS one.* 13, e0202893. doi: 10.1371/journal.pone.0202893
- 483 Yang, C. J., Zhang, X. G., Shi, G. Y., Zhao, H.Y., Chen, L., Tao, K., et al. (2011) Isolation and  
484 identification of endophytic bacterium W4 against tomato *Botrytis cinerea* and antagonistic  
485 activity stability. *Afr. J. Microbiol. Res.* 5, 131-136. doi: 10.5897/AJMR10.815
- 486 Yoo, S., Weon, H., Song, J., and Sang, M. (2020). Effects of *Chryseobacterium soldanellicola*  
487 T16E-39 and *Bacillus siamensis* T20E-257 on biocontrol against phytophthora blight and  
488 bacterial wilt and growth promotion in tomato plants. *Int J Agric Biol.* 23, 534-540. doi:  
489 10.17957/IJAB/15.1320
- 490 Zhang, B., Dong, C., Shang, Q., Han, Y., and Li, P. (2013). New insights into membrane-active  
491 action in plasma membrane of fungal hyphae by the lipopeptide antibiotic bacillomycin  
492 L. *Biochim Biophys Acta Biomembr.* 1828, 2230-2237. doi: 10.1016/j.bbamem.2013.05.033

493

494

495

496

497 **TABLE 1.** Isolated endophytic *Bacillus* species from tomato seeds with their accession numbers

| S.No. | Bacterial endophytic strains                                         | Total No. of isolates | Source | % similarity of the sequence | Accession number |
|-------|----------------------------------------------------------------------|-----------------------|--------|------------------------------|------------------|
| 1     | <i>Bacillus safensis</i> FO-36b                                      | 2                     | V1     | 99                           | CP010405.1       |
| 2     | <i>Bacillus safensis</i> FO-36b(T)                                   | 23                    | V1     | 100                          | ASJD01000027     |
| 3     | <i>Bacillus safensis</i> strain NBRC 100820                          | 12                    | V1,V2  | 99                           | NR_113945.1      |
| 4     | <i>Bacillus australimaris</i> strain MCCC 1A05787                    | 14                    | V1,V2  | 99                           | NR_148787.1      |
| 5     | <i>Bacillus australimaris</i> NH7I_1(T)                              | 1                     | V1     | 100                          | JX680098         |
| 6     | <i>Bacillus amyloliquefaciens</i> DSM7                               | 1                     | V1     | 99                           | FN597644.1       |
| 7     | <i>Bacillus amyloliquefaciens</i> strain MPA 1034                    | 2                     | V1,V2  | 99                           | NR_117946.1      |
| 8     | <i>Bacillus nakamurai</i> strain NRRL B-41091                        | 1                     | V1     | 99                           | NR_151897.1      |
| 9     | <i>Bacillus siamensis</i> KCTC 13613(T)                              | 8                     | V1     | 100                          | AJVF01000043     |
| 10    | <i>Bacillus zhangzhouensis</i> strain MCCC 1A08372                   | 7                     | V1,V2  | 99                           | NR_148786.1      |
| 11    | <i>Bacillus zhangzhouensis</i> DW5-4(T)                              | 1                     | V1     | 99.91                        | JOTP01000061     |
| 12    | <i>Bacillus subtilis</i> subsp. <i>inaquosorum</i> strain KCTC 13429 | 1                     | V1     | 96                           | CP029465.1       |
| 13    | <i>Bacillus subtilis</i> subsp. <i>subtilis</i> strain 168           | 1                     | V1     | 99                           | NR_102783.2      |

498

499

500

501

502 **TABLE 2.** Diversity indices of bacterial endophytes isolated from V1 and V2 variety of tomato

|                                     | V1        |      |           | V2        |      |           |
|-------------------------------------|-----------|------|-----------|-----------|------|-----------|
|                                     | Hypocotyl | Root | Cotyledon | Hypocotyl | Root | Cotyledon |
| <b>Shannon diversity</b>            | 1.45      | 1.3  | 1.33      | 0.94      | 1.28 | 0.92      |
| <b>Simpson's Index</b>              | 0.32      | 0.29 | 0.1       | 0.36      | 0    | 0.38      |
| <b>Simpson's index of diversity</b> | 0.67      | 0.7  | 0.9       | 0.63      | 1    | 0.61      |
| <b>Magalef' index</b>               | 2.1       | 1.67 | 1.87      | 0.91      | 1.3  | 0.83      |
| <b>Evenness</b>                     | 0.69      | 0.8  | 0.96      | 0.85      | 0.92 | 0.84      |
| <b>Species Richness</b>             | 8         | 5    | 4         | 3         | 4    | 3         |

503

504

505

506

507

508

509

510

511

512

513

514

515

516

517

518

519

520

521

522

523 **TABLE 3.** Comparison of different similarity indices among different regions of two organic  
524 varieties of tomato

| <b>V1 vs. V2</b> | <b>Species shared</b> | <b>Jaccard's SI</b> | <b>Sorensen's SI</b> |
|------------------|-----------------------|---------------------|----------------------|
| <b>Root</b>      | 1                     | 0.1                 | 0.182                |
| <b>Hypocotyl</b> | 2                     | 0.153               | 0.266                |
| <b>Cotyledon</b> | 0                     | 0                   | 0                    |

525

526

527

528

529

530

531

532

533

534

535

536

537

538

539

540

541

542

543

544

545

546

547

548

549

550 **TABLE 4.** Main mass peaks of the lipopeptides produced by *Bacillus siamensis* mass spectrometry

| Mass peaks (m/z) | Assignment                                            |
|------------------|-------------------------------------------------------|
| 994.8            | C12 Surfactin[M + H <sup>+</sup> ] <sup>+</sup>       |
| 1008.77          | C13 Surfactin[M + H <sup>+</sup> ] <sup>+</sup>       |
| 1022.72          | C14 Surfactin [M + H <sup>+</sup> ] <sup>+</sup>      |
| 1036.74          | C15 Surfactin [M + H <sup>+</sup> ] <sup>+</sup>      |
| 1050.75          | C16 Surfactin [M + H <sup>+</sup> ] <sup>+</sup>      |
| 1064.77          | C17 Surfactin [M + H <sup>+</sup> ] <sup>+</sup>      |
| 1096.86          | Linear C18 Surfactin                                  |
| 1045.77          | C15 Bacillomycin D [M + H <sup>+</sup> ] <sup>+</sup> |

551

552

553

554

555

556

557

558

559

560

561

562

563

564

565

566

567

568

569

570

571

572 **TABLE 5.** Growth study of seeds primed with the pure culture of *B. siamensis* with respect to the control

| <b>Parameters</b>        | <b>Untreated surface sterilized seeds (control)</b> | <b>Fresh culture treated seeds</b> | <b>Percentage increase by treatment over control (%)</b> |
|--------------------------|-----------------------------------------------------|------------------------------------|----------------------------------------------------------|
| Wet weight (mg)          | 21.1±3.00                                           | 29.8±3.68                          | 41.6                                                     |
| Hypocotyl length (cm)    | 4.9±0.75                                            | 6.6±0.87                           | 32.9                                                     |
| Root length (cm)         | 3.9±0.57                                            | 5.9±0.73                           | 49.1                                                     |
| Germination percentage % | 75                                                  | 80                                 | 6.7                                                      |

573 Values are the average of 3 replicates with 20 seeds in each and ± SE

574

575

576

577

578

579

580

581

582

583

584

585

586

587

588

589

590

591

592

593

594

595

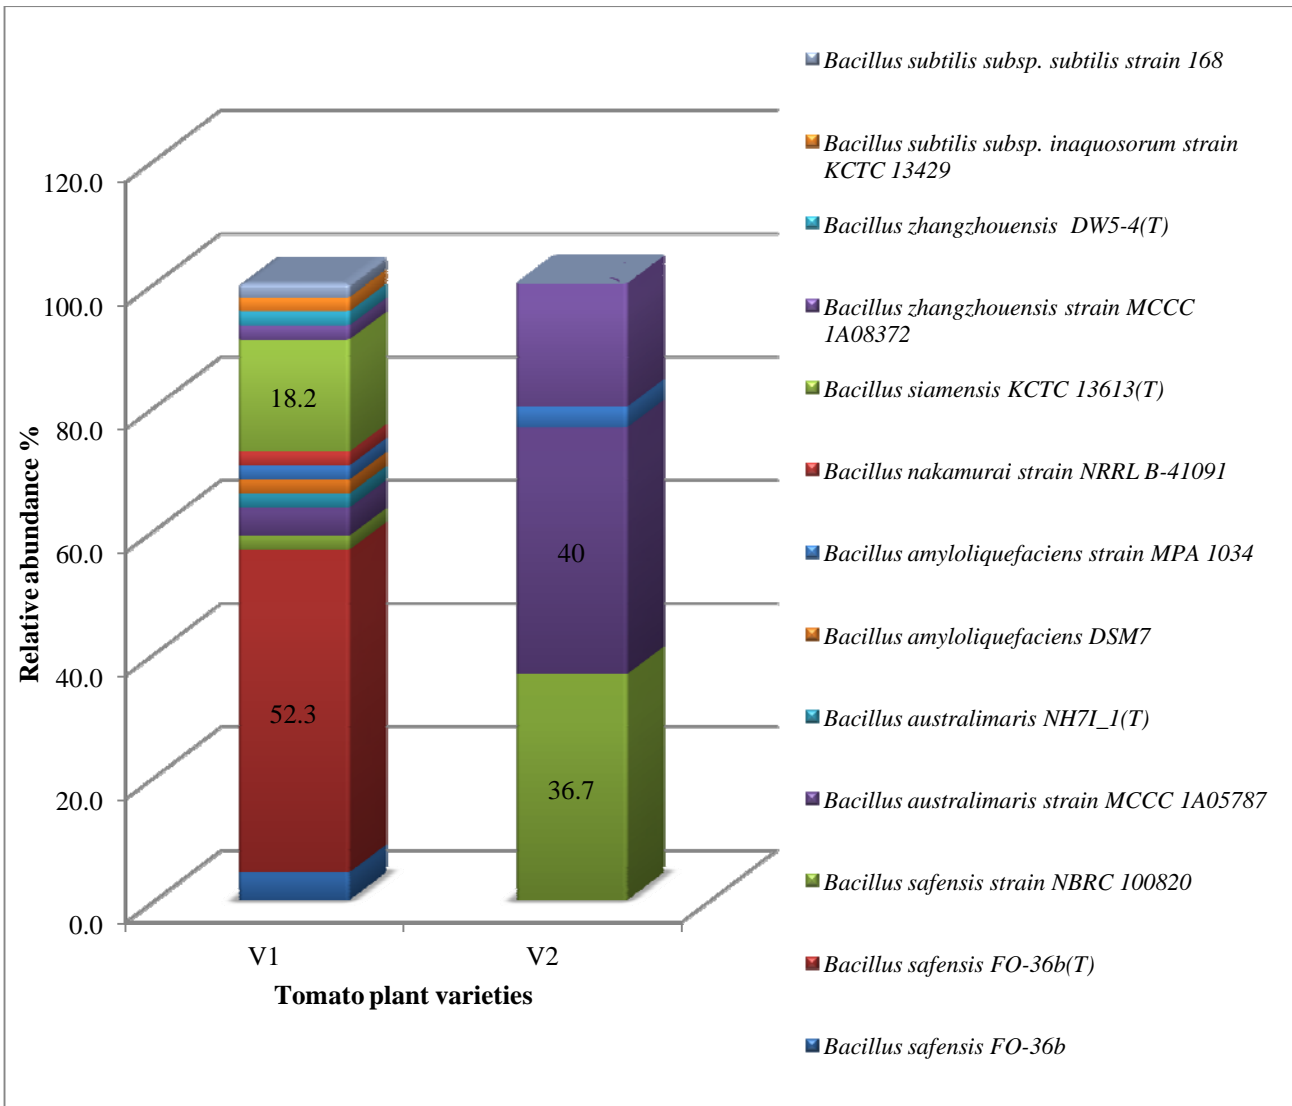

596

597 **FIGURE 1.** Taxonomic profiles of the bacterial community in each system at the species level with  
598 the relative abundance

599

600

601

602

603

604

605

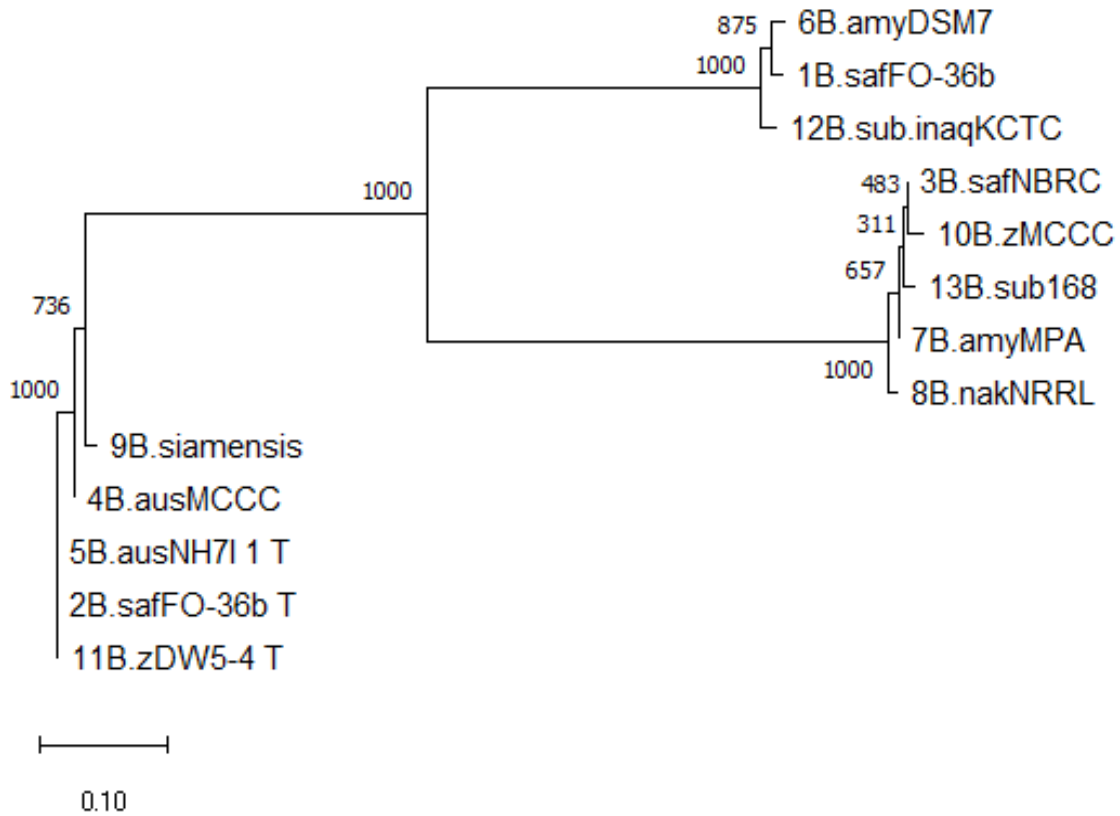

606

607

608 **FIGURE 2.** Phylogenetic tree constructed using 16S rRNA gene sequences of 13 different strains

609 of *Bacillus* species and bootstrap values are indicated at the nodes

610

611

612

613

614

615

616

617

618



**V1**

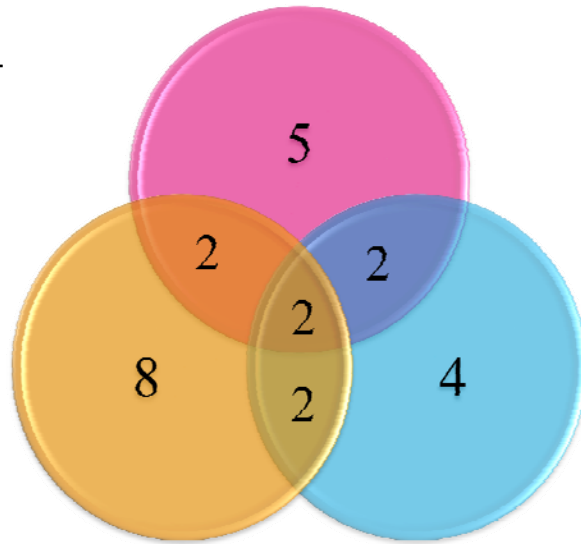

619

**V2**

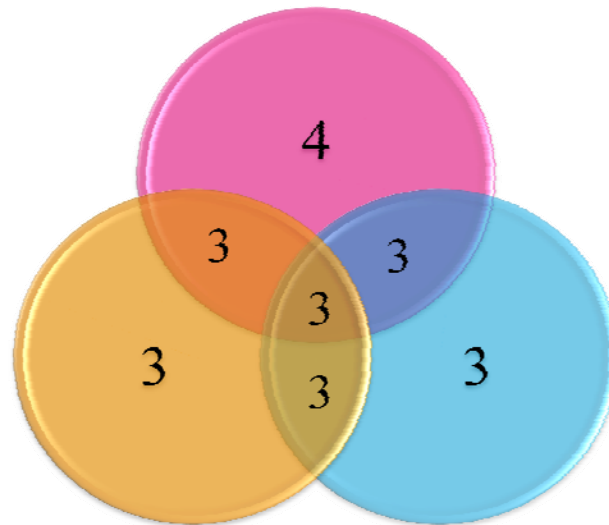

620

● **Root**    ● **Stem**    ● **Cotyledon**

621

622 **FIGURE 3.** Venn diagram representing the shared species of isolated bacterial endophytes within  
623 the variety

624

625

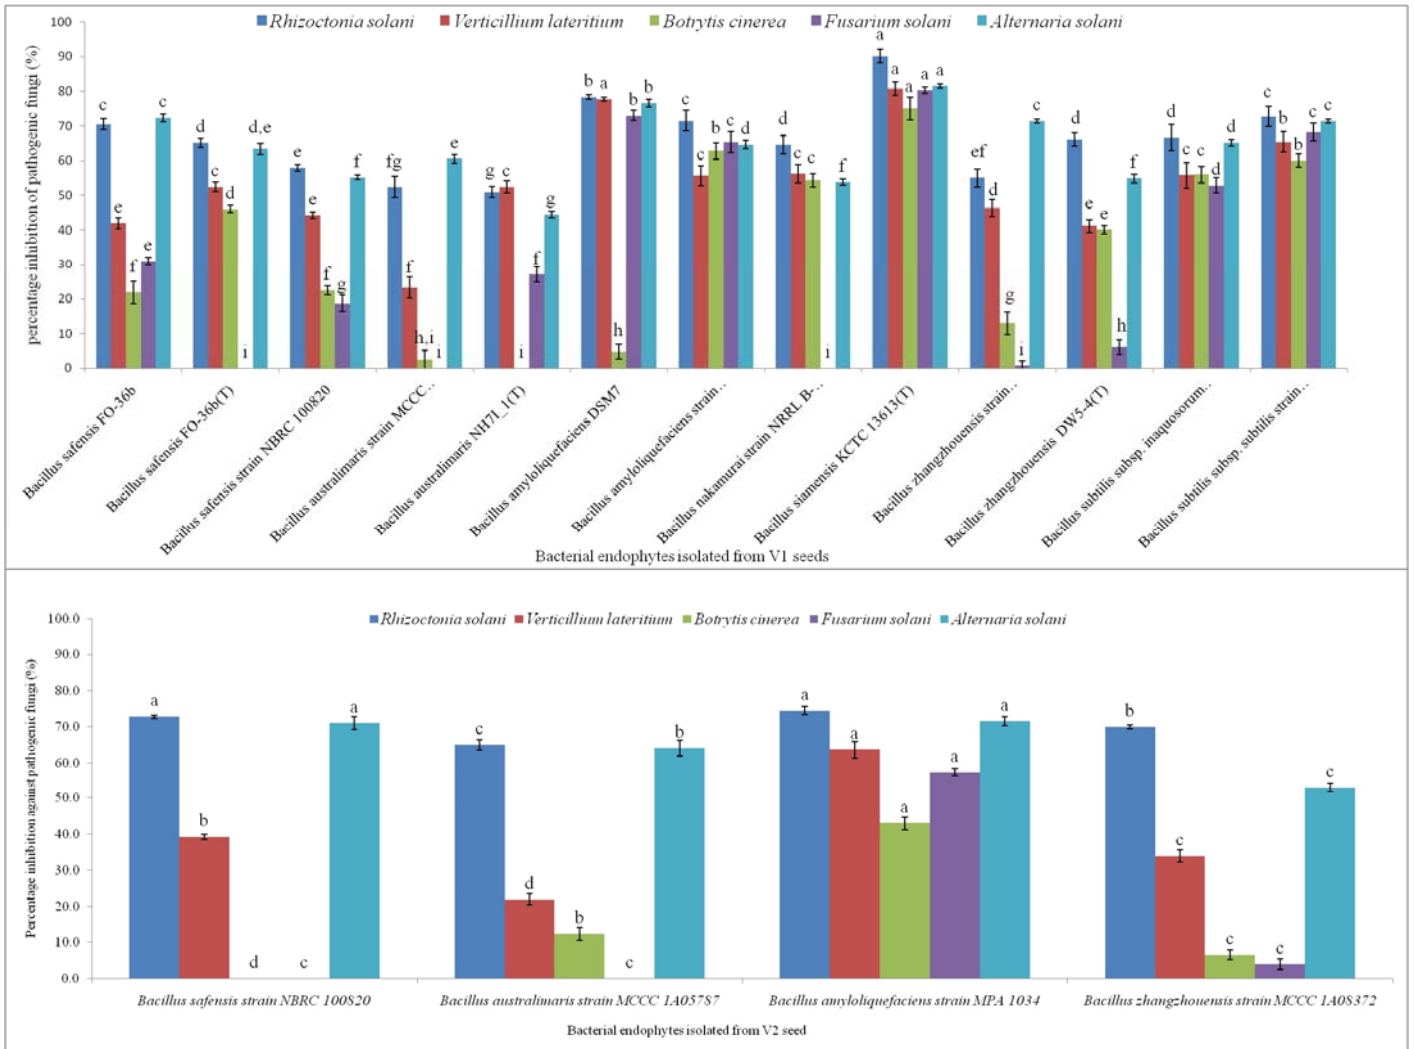

626

627 **FIGURE 4.** Antagonistic effect against five pathogenic test fungi by (A) *Bacillus* strains isolated  
 628 from V1; (B) *Bacillus* strains isolated from V2

629

630

631

632

633

634

635

636

637

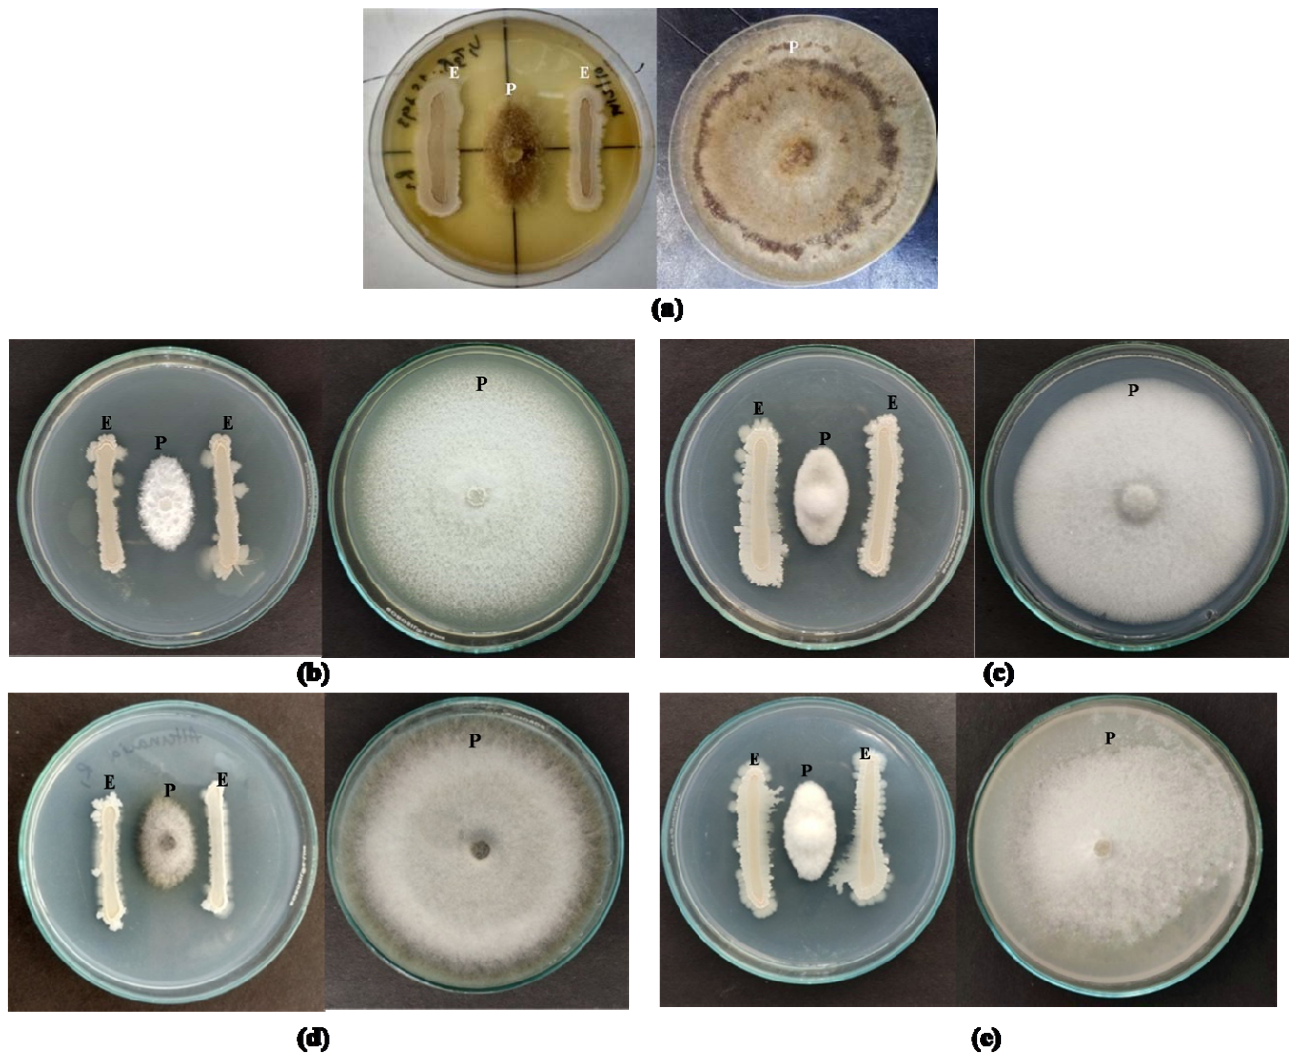

638

639 **FIGURE 5.** Antagonizing effect of *Bacillus siamensis* KCTC 13613(T) against (a) *Rhizoctonia*  
640 *solani*, (b) *Verticillium lateritium* (c) *Botrytis cinerea*, (d) *Alternaria solani*, and (e) *Fusarium*  
641 *solani* after six days of inoculation ('E' represents endophytic bacterial strain whereas 'P' represents  
642 Pathogenic fungi)

643

644

645

646

647

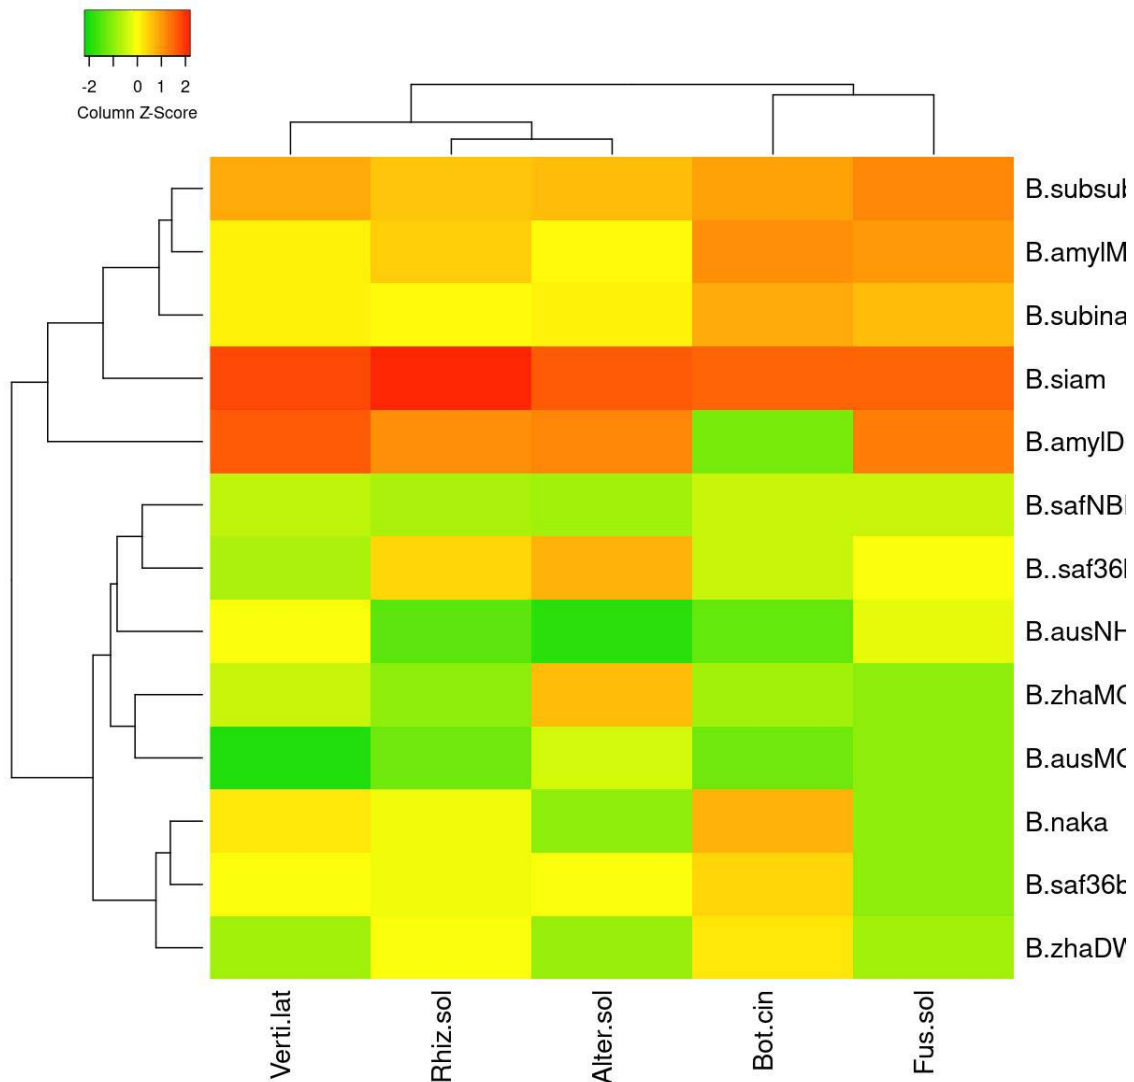

648

649 Endophytic bacterial strains:

650 *Bacillus subtilis* subsp. *subtilis* strain 168

651 *Bacillus amyloliquefaciens* strain MPA 1034

652 *Bacillus subtilis* subsp. *inaquosorum* strain KCTC 13429

653 *Bacillus siamensis* KCTC 13613(T)

654 *Bacillus amyloliquefaciens* DSM7

655 *Bacillus safensis* strain NBRC 100820

656 *Bacillus safensis* FO-36b(T)

657 *Bacillus australimaris* NH7I\_1(T)

658 *Bacillus zhangzhouensis* strain MCCC 1A08372

659 *Bacillus australimaris* strain MCCC 1A05787

660 *Bacillus nakamurai* strain NRRL B-41091

661 *Bacillus safensis* FO-36b

662 *Bacillus zhangzhouensis* DW5-4(T)

Fungal pathogens:

*Verticillium lateritium*

*Rhizoctonia solani*

*Alternaria solani*

*Botrytis cinerea*

*Fusarium solani*

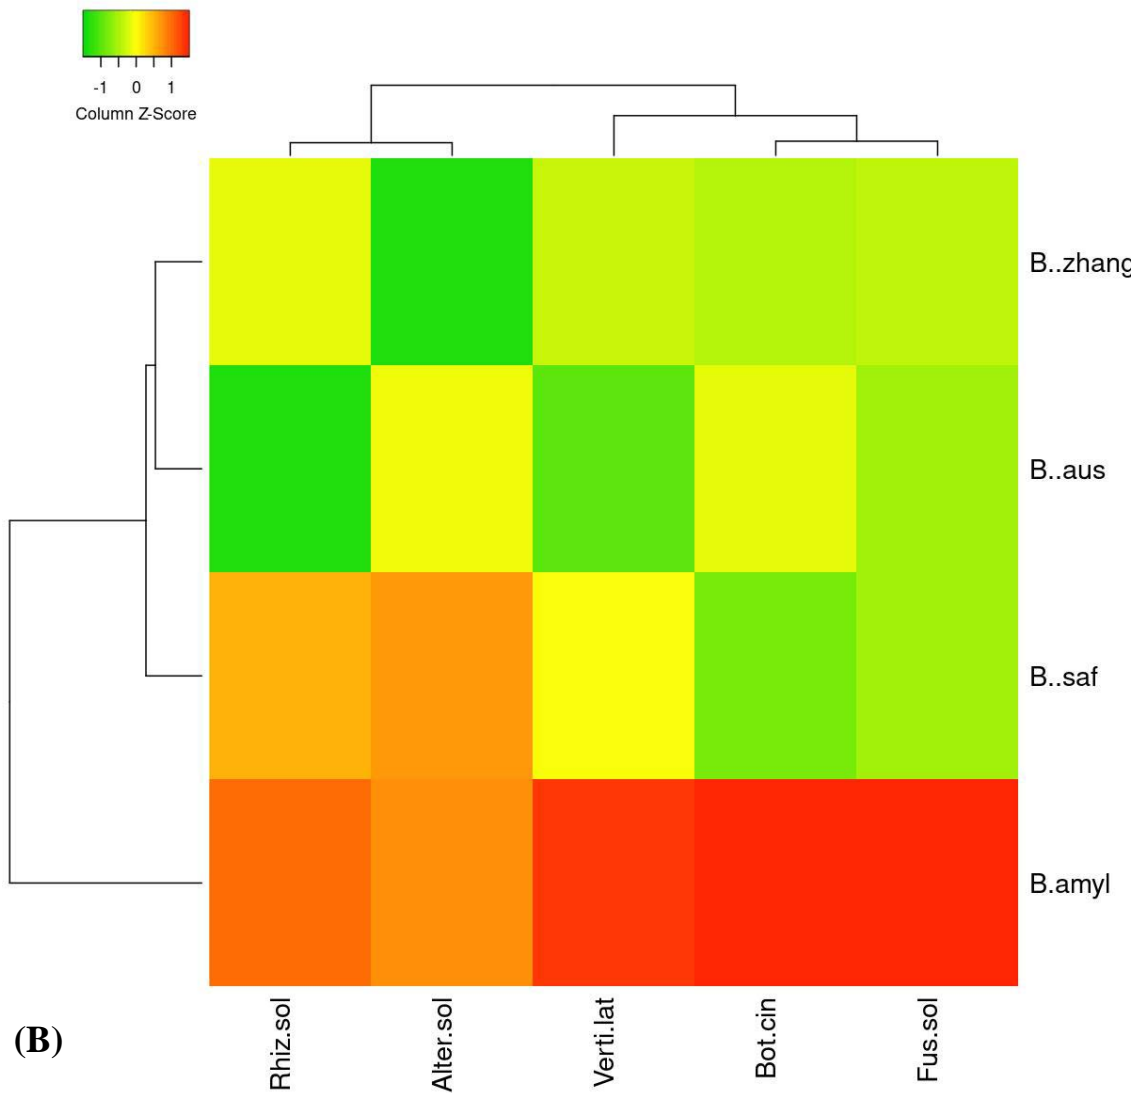

663

664 Endophytic bacterial strains:

665 *Bacillus zhangzhouensis* strain MCCC 1A08372

666 *Bacillus australimaris* strain MCCC 1A05787

667 *Bacillus safensis* strain NBRC 100820

668 *Bacillus amyloliquefaciens* strain MPA 1034

669

670

671

Fungal pathogens:

*Rhizoctonia solani*

*Alternaria solani*

*Verticillium lateritium*

*Botrytis cinerea*

*Fusarium solani*

672 **FIGURE 6.** Heat map illustrating the strength of antifungal activity of different *Bacillus* strains of

673 (A) V1 and (B) V2 against all five pathogenic fungi with respect to other strains

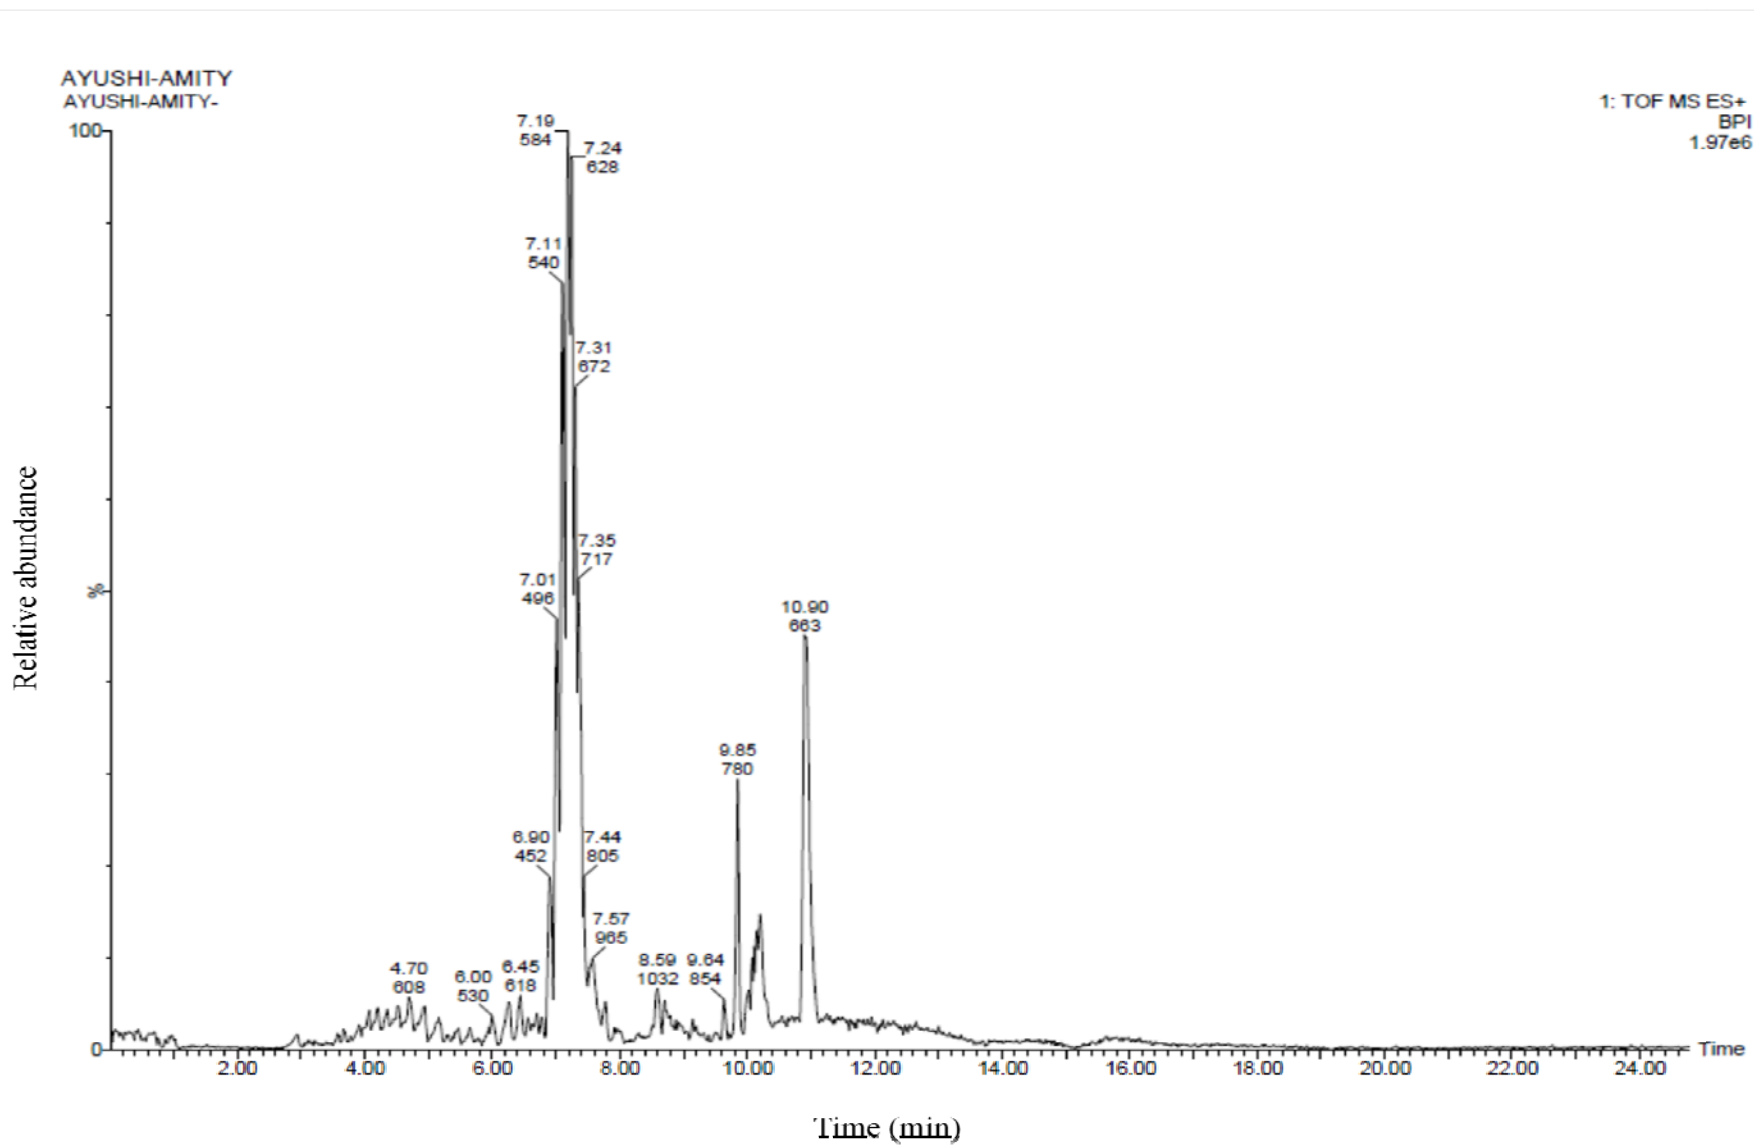

674

675 (A)

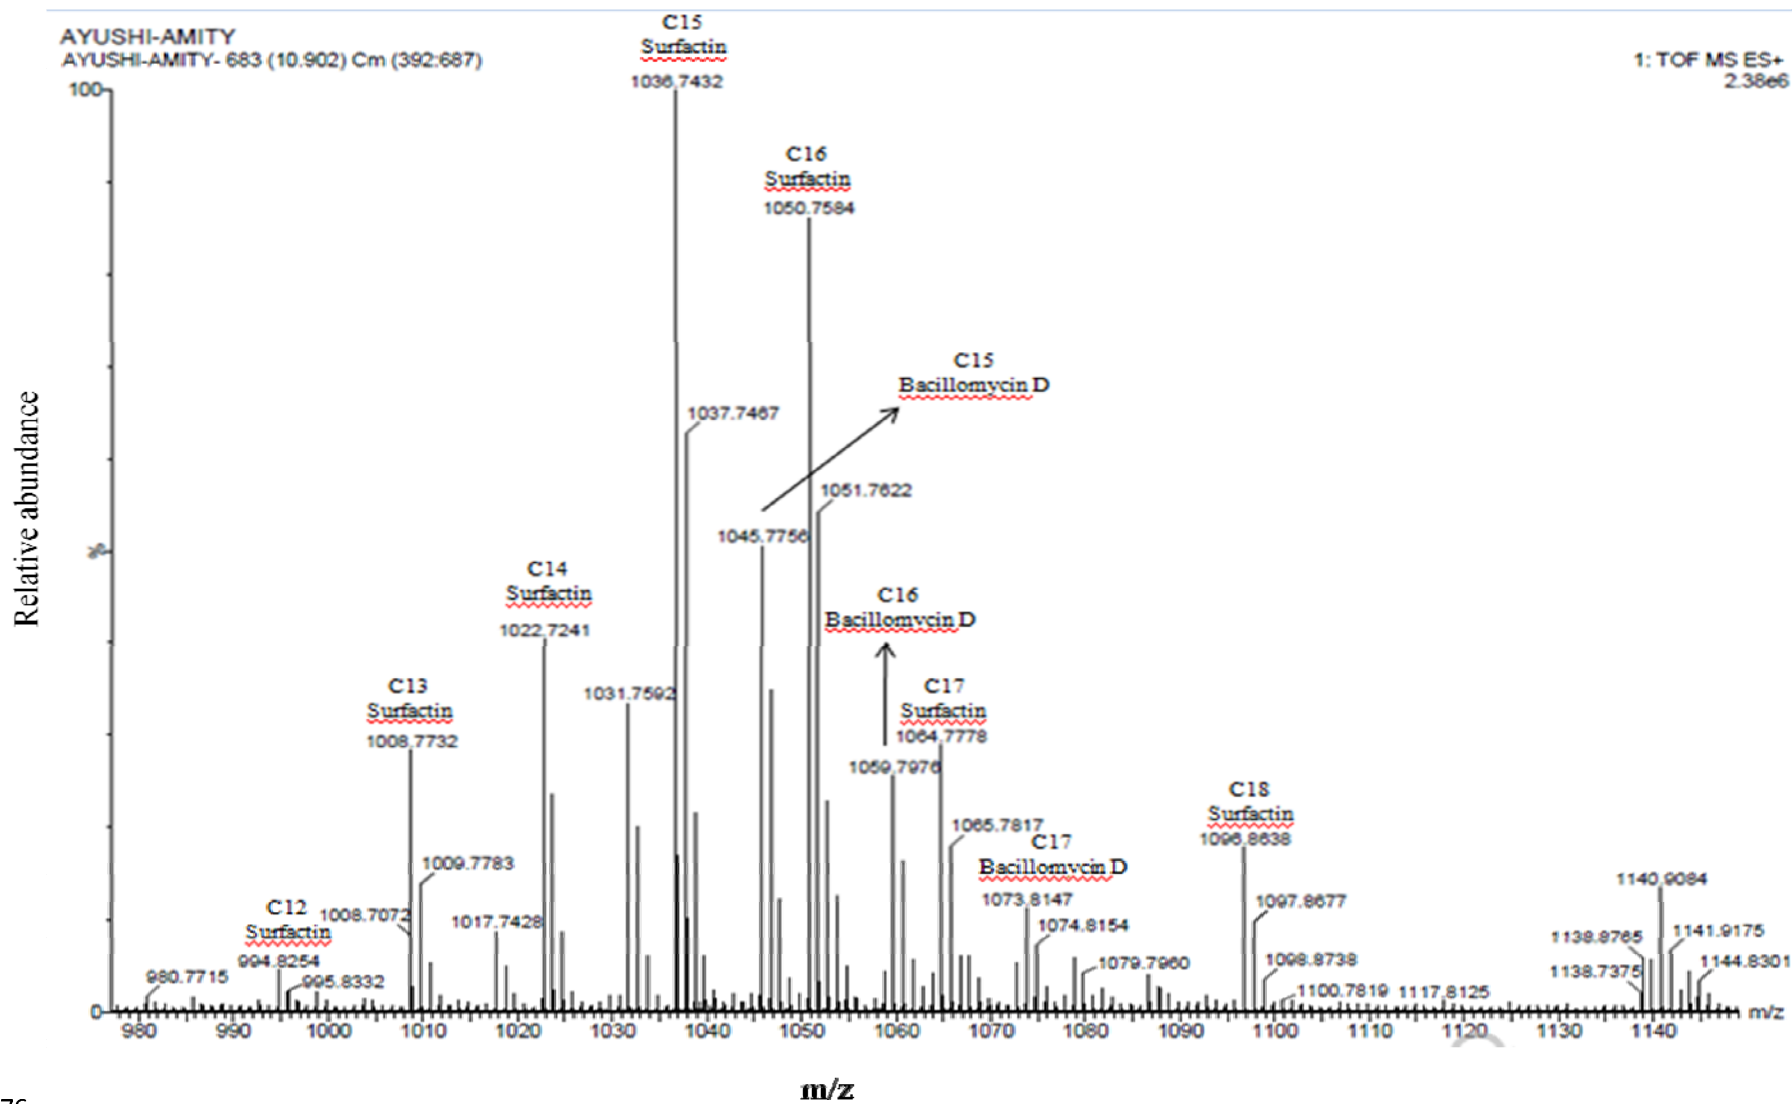

676

677 (B)

678 **FIGURE 7.** A) UPLC chromatogram of lipopeptides extracted from *Bacillus siamensis* strain; B) HDMS accurate mass revealed the  
679 production of Surfactin and Bacillomycin D analogues

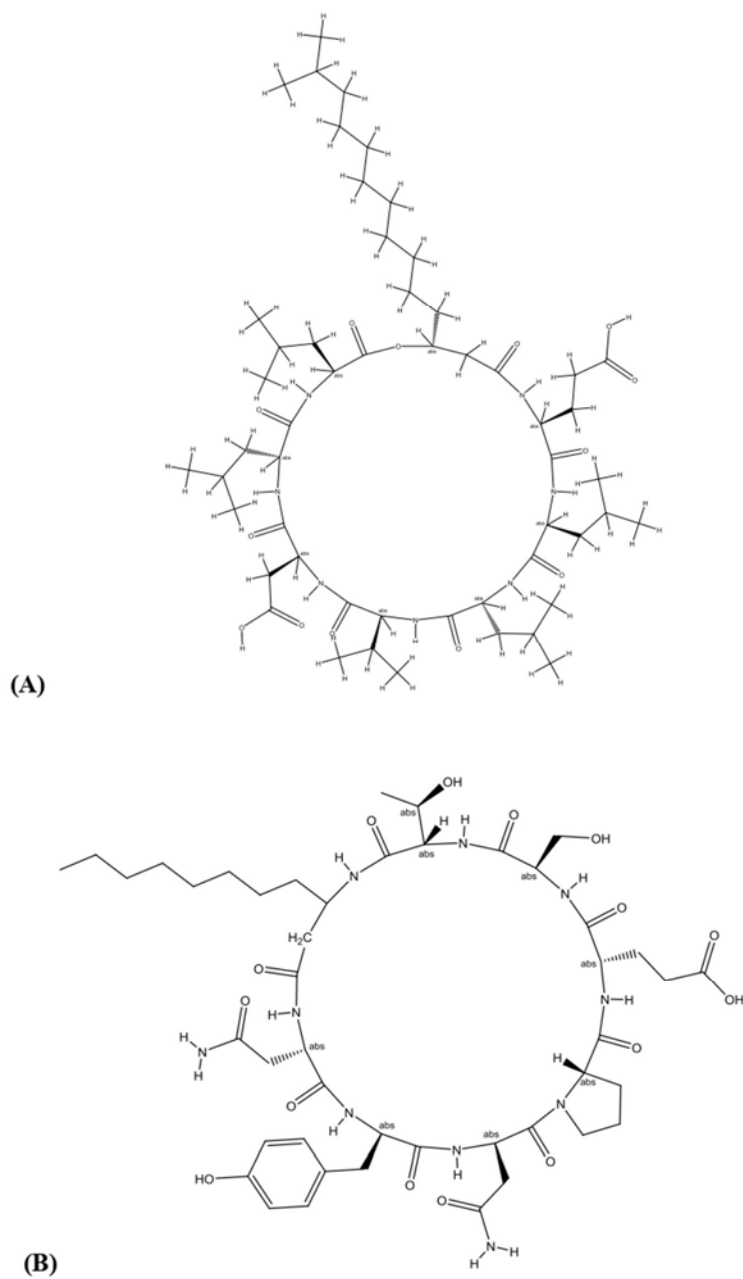

680

681

682 **FIGURE 8.** General molecular structure of lipopeptides (A) Surfactin and (B) Bacillomycin isolated  
683 from *B. siamensis*

684

685

686



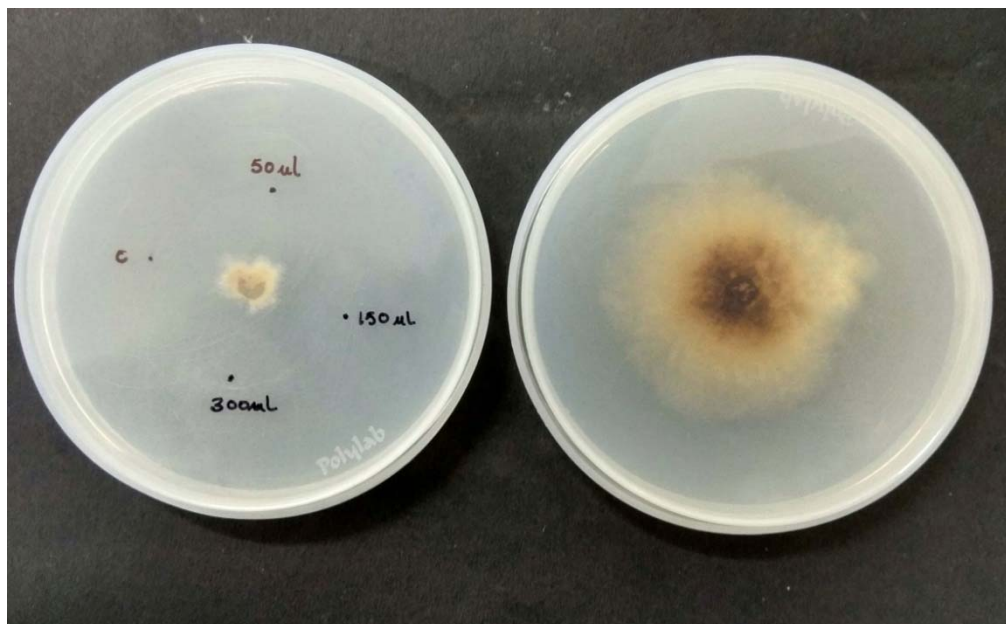

687

688 **FIGURE 9.** Antifungal bioassay of lipopeptide extracted from *Bacillus siamensis* strain at three  
689 different concentrations (A) 50 ppm, 150 ppm and 300 ppm; (B) Pure control

690

691

692

693

694

695

696

697

698

699

700

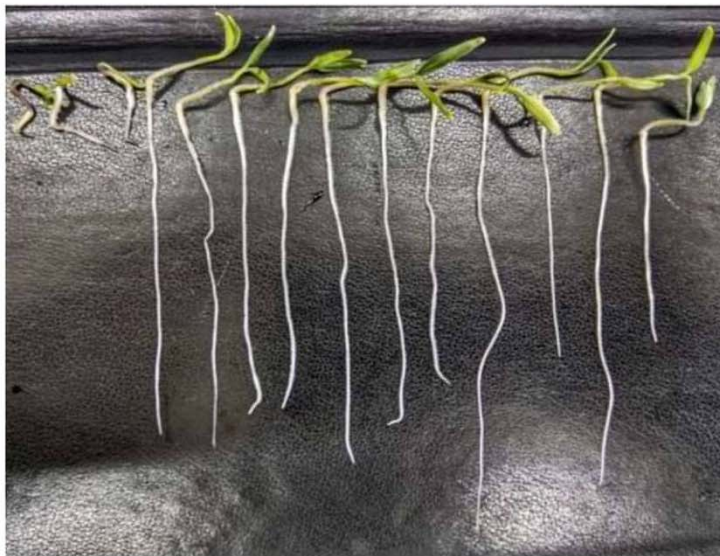

(A)

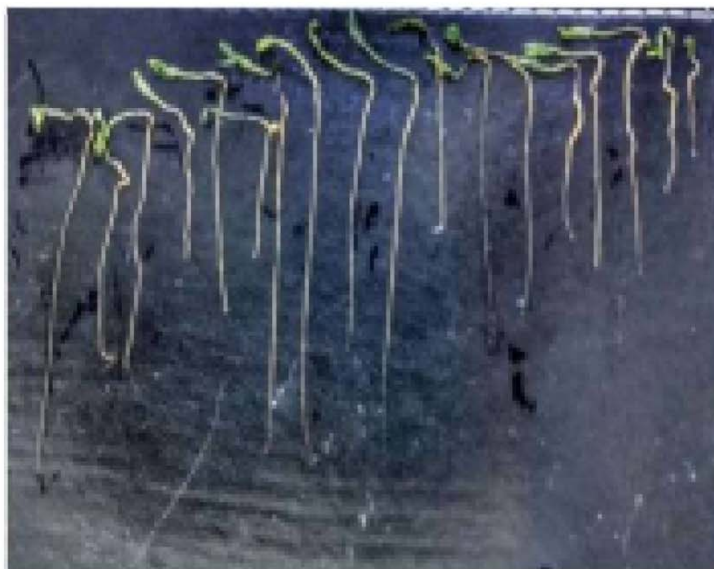

(B)

701

702 **FIGURE 10.** Germinated seedlings from bio-primed tomato seeds after 9 days (A) and control (B)
